# Supplementary material for: DoMY-Seq: A yeast two-hybrid–based technique for precision mapping of protein–protein interaction motifs
Source: PubMed Central journal article supplement (PMC7949039; doi:10.1074/jbc.ra120.014284), 2020-11-23
Supplement: mmc1.pdf [file mmc1.pdf]

## **Supporting Information**

### **DoMY-Seq: A yeast two-hybrid-based technique for precision mapping of protein-protein interaction motifs**

Pau Castel, Ann Holtz-Morris, Yongwon Kwon, Bernhard Suter, Frank McCormick

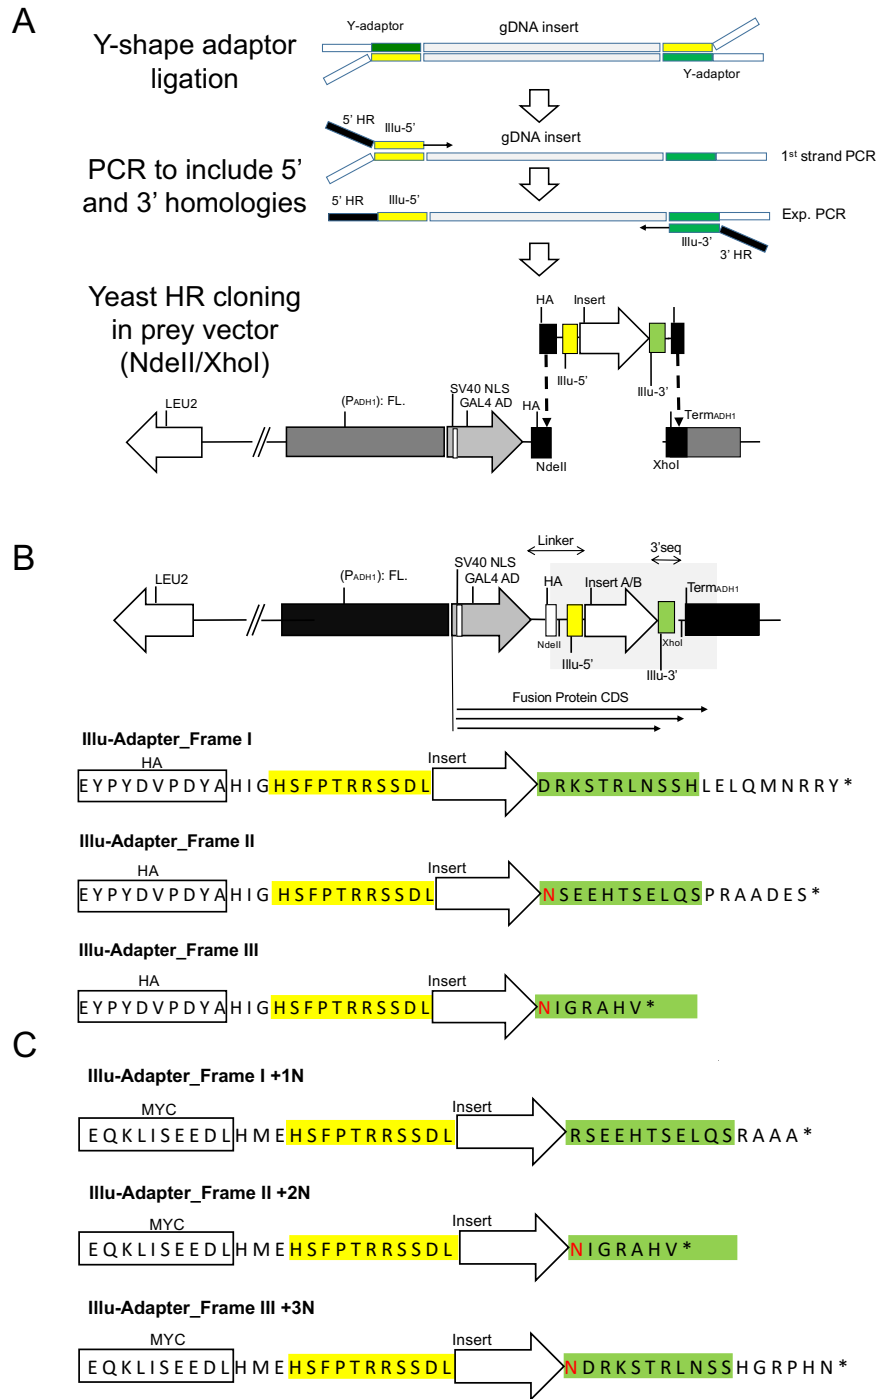

**Figure S1. Overview library construction.** (A) Experimental workflow for cloning library fragments for DoMY-Seq. DNA fragments are ligated with Y-adaptors, PCR amplified to introduce homology arms, and recombined into target vectors between NdeII and XhoI restriction enzyme sites. 50% of the fragments result in the right orientation. (B) Schematic overview of the different frames that are obtained in the prey vector (pGAD). While 33% of the insert are at the right frame, only half of these will be also at the right orientation. (C) Same as B for the bait vector (pGBKT7).

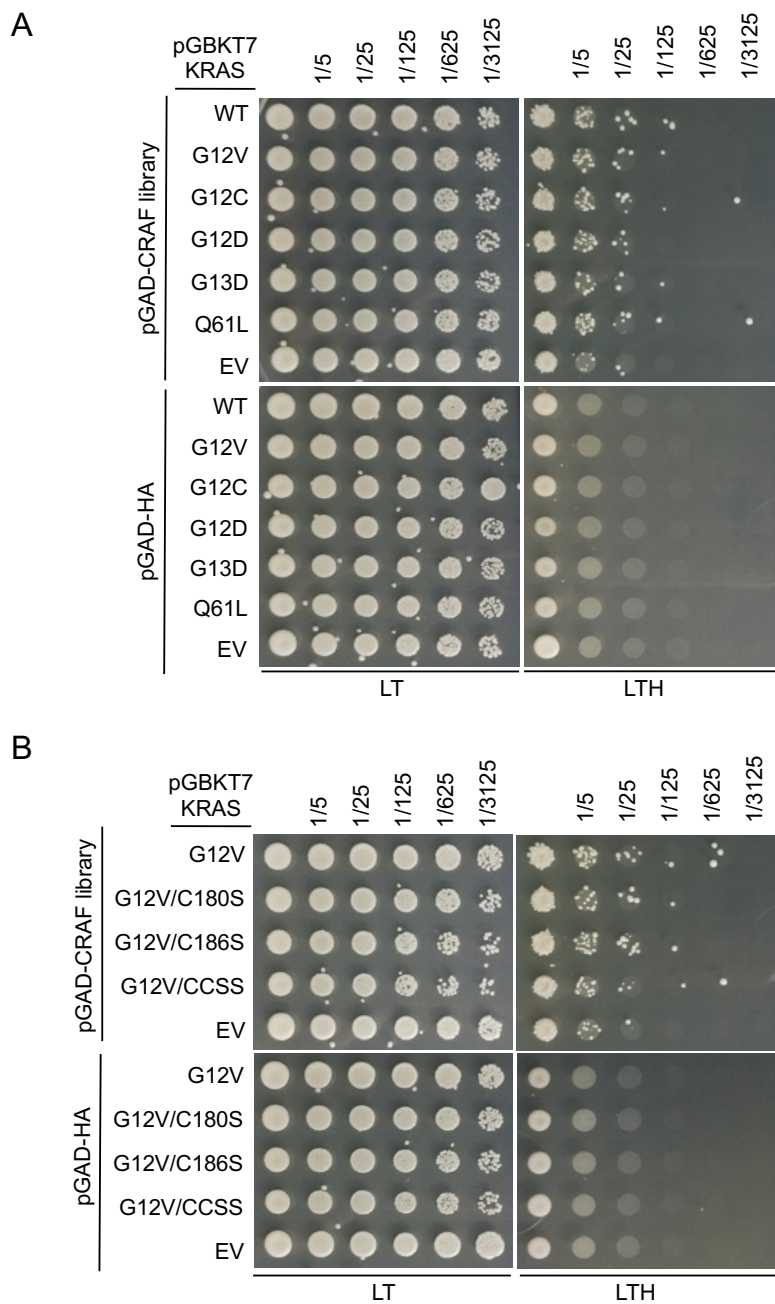

**Figure S2. Optimization of the KRAS bait.** (A) Colony growth assay using different KRAS oncogenic mutants in the bait vector pGBKT7 and mated to yeast containing the prey CRAF library in the pGAD vector. Colonies were incubated for 48 hours in basal media (LT) or dropout media (LTH). Five-fold dilutions are shown. (B) Colony growth assays as described in A using the C-terminal mutants that prevent lipidation of KRAS.

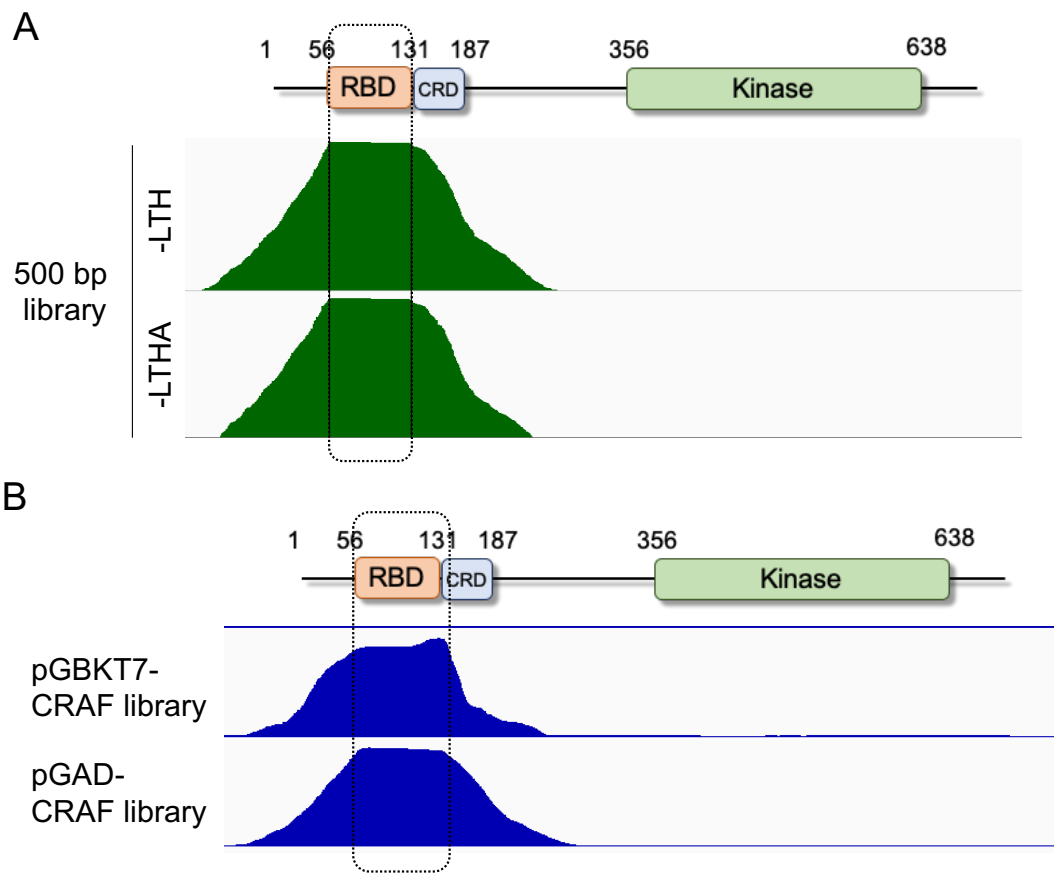

**Figure S3. CRAF library cloned in the reversed orientation.** (A) A library of longer CRAF fragments (~500 bp) was used for DoMY-Seq and revealed a similar KRAS-interacting motif when selected in dropout media -LTH or -LTHA. (B) The library of CRAF fragments was cloned in the pGAD vector instead of the pGBKT7 vector and assayed for binding to KRAS using DoMY-Seq. Although the binding motif obtained was similar in both assay orientations, the background reads were higher in the pGBKT7-library orientation.

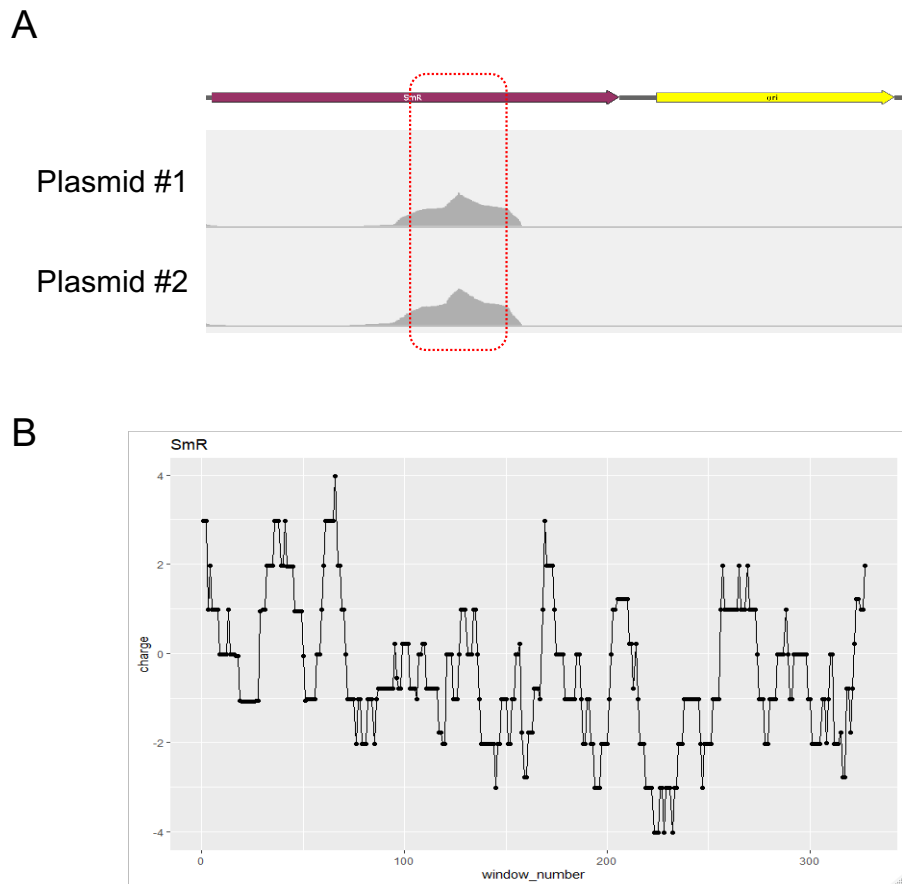

**Figure S4. Acidic sequence in the Spectinomycin resistance gene.** (A) Different plasmids used to generate libraries for DoMY-Seq in the bait (pGBKT7) orientation contained the Spectinomycin resistance gene (SmR). This sequence exhibited transactivation activity in our assay as shown in the IGV snapshots. Other regulatory sequences commonly found in plasmids (e.g. ori) were not found to contain such sequences. (B) A custom R script can be run to determine the charge of specific aa in a gene. Note the negatively charged sequence around amino acid position 225. The position of this sequence matches the transactivation region seen in A. Such transactivating regions (9aa TAD) are characterized by the presence of acidic, aromatic, and hydrophobic amino acids.

## Bait cloning

| Primer name    | Sequence                                                               |
|----------------|------------------------------------------------------------------------|
| pGBKT7-KRAS-Fw | GAGGAGGACCTGCATATGGCCATGGAGGCCGAATTCATGCCAACTTTGTACAAAAAAGTT           |
| pGBKT7-KRAS-Rv | ATGCTAGTTATGCGGCCGCTGCAGGTCGACGGATCCTTACATTATAATGCATTTTTTAATTTTCACACAG |
| pLexA-RIT1-Fw  | GTTGGGGTTATTCGCAACGGCGACTGGCTGGAATTCATGGATTCTGGAACCTGCCCCAGTT          |
| pLexA-RIT1-Rv  | GGGCGAGCGAGTTGGTTCGACCCGCGGCTGCAGGGTACCTCAAGTTACTGAATCTTTCTTC          |
| pGBKT7-RIT1-Fw | TCAGAGGAGGACCTGCATATGGCCATGGAGGCCGAATTCATGGATTCTGGAACCTGCCCA           |
| pGBKT7-RIT1-Rv | TGCTAGTTATGCGGCCGCTGCAGGTCGACGGATCCTTATCAAGTTACTGAATCTTTCTTC           |
| pGAD-CRAF-Rv   | GTATCTACGATTCATCTGCAGCTCGAGCTCGATGGATCCTTAGAAGACAGGCAGCCCTCGG          |
| pGAD-CRAF-Fw   | CCAGATTACGCTCATATGGCCATGGAGGCCGAATTCATGCCAACTTTGTACAAAAAAGTT           |
| pGBKT7-MEK1-Fw | CAGAGGAGGACCTGCATATGGCCATGGAGGCCGAATTCATGCCAAGAAGAAGCCGACGC            |
| pGBKT7-MEK1-Rv | TATGCTAGTTATGCGGCCGCTGCAGGTCGACGGATCCTTAGACGCCAGCAGCATGGGTTG           |
| pGAD-P53-Fw    | ACCAGATTACGCTCATATGAACATGGAGGCCAGTGAATTCATGGAGGAGCCGACGTGAGA           |
| pGAD-P53-Rv    | GTATCTACGATTCATCTGCAGCTCGAGCTCGATGGATCCTCAGTCTGAGTCAGGCCCTTC           |

## Mutagenesis

| Primer name   | Sequence                                           |
|---------------|----------------------------------------------------|
| KRAS T35A Fw  | GAATATGATCCAGCAATAGAGGATTCTACAGG                   |
| KRAS T35A Rv  | TCCTCTATTGCTGGATCATATTCGTCACAAAATG                 |
| KRAS E37G Fw  | CCAACAATAGGGGATTCTACAGGAAGCAAG                     |
| KRAS E37G Rv  | GTAGGAATCCCCTATTGTTGGATCATATTCG                    |
| KRAS C186S Fw | GAAAATTAATAAAGCATTATAATGTAAGGATCC                  |
| KRAS C186S Rv | CATTATAATGCTTTTTTAATTTTCACACAGCCAGG                |
| KRAS C180S Fw | GACTCCTGGCAGTGTGAAAATTAATAAATGC                    |
| KRAS C180S Rv | ATTTTCACACTGCCAGGAGTCTTTTCTCTTTG                   |
| KRAS CCSS Fw  | GACTCCTGGCAGTGTGAAAATTAATAAAGCATTATAATGTAAGGATCC   |
| KRAS CCSS Rv  | CATTATAATGCTTTTTTAATTTTCACACTGCCAGGAGTCTTTTCTCTTTG |

## AdaptorHR

| Primer name             | Sequence                                                                   |
|-------------------------|----------------------------------------------------------------------------|
| Illu5'_pGAD-AdaptorHR   | CATGGAGTACCCATACGACGTACCAGATTACGCTCATATGGAACACTCTTCCCTACACGACGCTCTCCGATCT  |
| Illu3'_pGAD-AdaptorHR   | TGCGGGGTTTTTCAGTATCTACGATTCATCTGCAGCTCGAGGTGACTGGAGTTCAGACGTGTGCTCTCCGATCT |
| Illu5'_pGBKT7_AdaptorHR | GAGGAGCAGAAGCTGATCTCAGAGGAGGACCTGCATATGGAACACTCTTCCCTACACGACGCTCTCCGATCT   |
| Illu3'_pGBKT7_AdaptorHR | GAGGCCCAAGGGGTTATGCTAGTTATGCGGCCGCTGACTGGAGTTCAGACGTGTGCTCTCCGATCT         |

## Universal adapters (from Illumina)

| Primer name              | Sequence                                                          |
|--------------------------|-------------------------------------------------------------------|
| TruSeq Universal Adapter | AATGATACGGCGACCACCGAGATCTACACTCTTCCCTACACGACGCTCTTCCGATCT         |
| TruSeq Adapter, Index 2  | GATCGGAAGAGCACACGTCTGAACTCCAGTCACCGATGTATCTCGTATGCCGTCTTCTGCTTG   |
| TruSeq Adapter, Index 4  | GATCGGAAGAGCACACGTCTGAACTCCAGTCACACTGACCAATCTCGTATGCCGTCTTCTGCTTG |
| TruSeq Adapter, Index 5  | GATCGGAAGAGCACACGTCTGAACTCCAGTCACACAGTATCTCGTATGCCGTCTTCTGCTTG    |
| TruSeq Adapter, Index 6  | GATCGGAAGAGCACACGTCTGAACTCCAGTCACGCCAATATCTCGTATGCCGTCTTCTGCTTG   |
| TruSeq Adapter, Index 7  | GATCGGAAGAGCACACGTCTGAACTCCAGTCACACAGATCATCTCGTATGCCGTCTTCTGCTTG  |
| TruSeq Adapter, Index 12 | GATCGGAAGAGCACACGTCTGAACTCCAGTCACCTTGAATCTCGTATGCCGTCTTCTGCTTG    |
| TruSeq Adapter, Index 15 | GATCGGAAGAGCACACGTCTGAACTCCAGTCACATGTCAGAATCTCGTATGCCGTCTTCTGCTTG |
| TruSeq Adapter, Index 18 | GATCGGAAGAGCACACGTCTGAACTCCAGTCACGTCCGCACATCTCGTATGCCGTCTTCTGCTTG |

**Indexing PCR primers (Paragon Genomics SKU 716005)**

| <b>Primer name</b> | <b>Sequence</b>                                                    |
|--------------------|--------------------------------------------------------------------|
| A501               | AATGATACGGCGACCACCGAGATCTACTGAACCTTACTCTTCCCTACACGACGCTCTCCGATCT   |
| A502               | AATGATACGGCGACCACCGAGATCTACTGCTAAGTACTCTTCCCTACACGACGCTCTCCGATCT   |
| A503               | AATGATACGGCGACCACCGAGATCTACTGTTCTTACTCTTCCCTACACGACGCTCTCCGATCT    |
| A504               | AATGATACGGCGACCACCGAGATCTACTAAGACACACTCTTCCCTACACGACGCTCTCCGATCT   |
| A701               | CAAGCAGAAGACGGCATAACGAGATGTCGTGATGTGACTGGAGTTCAGACGTGTGCTCTCCGATCT |
| A702               | CAAGCAGAAGACGGCATAACGATACACTGTGTGACTGGAGTTCAGACGTGTGCTCTCCGATCT    |
| A703               | CAAGCAGAAGACGGCATAACGATTGGATCTGGTACTGGAGTTCAGACGTGTGCTCTCCGATCT    |
| A704               | CAAGCAGAAGACGGCATAACGATCCGTTGTGTGACTGGAGTTCAGACGTGTGCTCTCCGATCT    |

**Table S1. Primers used in this study.**
